# Supplementary material for: Polyoxometalate-HKUST-1 composite derived nanostructured Na–Cu–Mo2C catalyst for efficient reverse water gas shift reaction
Source: Royal Society of Chemistry journal article supplement (doi:10.1039/d4nr01185f), 2024-01-01
Supplement: d4nr01185f1.pdf [file d4nr01185f1.pdf]

# **Polyoxometalate-HKUST-1 composite derived nanostructured Na-Cu-Mo<sub>2</sub>C catalyst for efficient reverse water gas shift reaction**

Gaje Singh <sup>a,d</sup>, Satyajit Panda <sup>a,d</sup>, Siddharth Sapan <sup>a</sup>, Jogender Singh <sup>a</sup>, Pranay Rajendra

Chandewar <sup>c</sup>, Ankush Biradar <sup>b,d</sup>, Debaprasad Shee <sup>c</sup>, Ankur Bordoloi <sup>a,d,\*</sup>

a. Light and Stock Processing Division, CSIR-Indian Institute of Petroleum (IIP),

Dehradun-248005, India

b. Inorganic Materials and Catalysis Division, CSIR-Central Salt and Marine Chemicals

Research Institute, G. B. Marg, Bhavnagar-364002, India

c. Department of Chemical Engineering, Indian Institute of Technology, Hyderabad

502284, India

d. Academy of Scientific and Innovative Research (AcSIR), Ghaziabad-201002, India

\*Corresponding author: Light and Stock Processing Division, CSIR-Indian Institute of Petroleum (IIP), Dehradun 248005, India.

\*Corresponding author. E-mail address: ankurb@iip.res.in (A. Bordoloi)

---

# Experimental Details

## Catalyst characterizations

The PROTO AXRD® Benchtop Powder diffractometer, equipped with a NaI (TI) scintillation counter detector and CuK $\alpha$  radiation (0.154 nm), was used to capture X-ray diffraction (XRD) patterns from 10 to 80°. The samples were measured At room temperature using an X-ray power of 600 Watts (40 kV/15 mA). The Scherrer equation determined the crystalline size of the catalysts,

$$d = \frac{K \lambda}{\beta \cos \theta}$$

Where d is crystalline size, K is the Scherrer constant (0.9),  $\lambda$  is the wavelength of the X-ray beam used (0.154 nm),  $\beta$  is the Full width at half maximum (FWHM) of the peak, and  $\theta$  is the Bragg angle.

A Horiba LabRAM HR Evolution Raman Spectrometer was used to acquire Raman spectra with a 532 nm laser serving as the excitation source. Before analysis, the apparatus's synapse detector was thermoelectrically cooled to -75 °C, and the x-axis of the instrument was calibrated using a silicon wafer.

A tungsten filament doped with lanthanum hexaboride (LaB6) and a high vacuum ETD detector was used to capture SEM pictures of the synthesized catalyst using an FEI Quanta 200 F. The analysis was conducted by spreading the samples out on carbon tape.

The JEOL JEM-2100 device was used to collect images for transmission electron microscopy (TEM) and high-resolution transmission electron microscopy (HR-TEM). For 30 min, a small amount of catalyst was sonicated and distributed throughout ethanol. The sample was then dried in a vacuum desiccator after a few drops were placed on a copper grid supported with lacey carbon. The grid was placed on the sample holder and the instrument's accelerating voltage was set to 160 kV before the analysis. The samples were next examined with a JEM-2100 electron microscope for a range of studies, such as energy-dispersive X-ray spectroscopy (EDS) mapping, HR-TEM images, TEM, and selected area electron diffraction (SAED) pattern.

The Inductively coupled plasma optical emission spectrometry (ICP-OES) was performed using the Teledyne Leeman Labs Prodigy7 instrument. A high-temperature argon plasma was used to ignite the atoms in a 20 ml aliquot, resulting in emission lines. The emission line intensity is compared to the intensity of the known and variable amounts of elements to calculate their concentration.

The CO<sub>2</sub> Temperature-Programmed Desorption (CO<sub>2</sub> TPD) analysis was performed using a Micrometrics® Autochem II 2920 instrument. An amount of 0.055 g of catalyst sample was placed in a U-shaped quartz reactor. The catalyst was pre-treated for 1 h at 200 °C in 25 ml.min<sup>-1</sup> of He flow and then cooled to 50 °C. Subsequently, for CO<sub>2</sub> adsorption, a 40 ml.min<sup>-1</sup> flow of 10 vol. % CO<sub>2</sub>/He mixture gas was introduced into the reactor. Following that, the sample was exposed to 40 ml.min<sup>-1</sup> He flows for 60 min to eliminate physisorbed species. The desorption was investigated using a 5 °C.min<sup>-1</sup> ramping rate from 50 to 850 °C.

X-ray photoelectron spectroscopy (XPS) was performed using a Thermo Scientific NEXSA XPS spectrometer and monochromatic X-ray radiation (AlK $\alpha$ ) (1486.6 eV) at a 15kV accelerating voltage. The calibration benchmark for all elemental binding energies was the adventitious C 1s peak at 284.8 eV. The Shirley-type background removal was used using the XPSPEAK41 software to fit the XPS spectra.

TGA was performed using a Perkin Elmer TGA 4000 Thermogravimetric Analyzer. A sample of approximately 5 mg was put in a ceramic sample pan. The samples were heated from 30°C to 800°C using a 20 ml.min<sup>-1</sup> nitrogen flow at a ramp rate of 10°C/min.

The instrument used for Fourier transform infrared spectroscopy was made by Perkin Elmer Inc. in Massachusetts, USA. The apparatus was calibrated using the polystyrene calibration film. The samples were produced in moisture-free KBr pellets, and after that, pelletized specimens were analyzed with a deuterated triglycine sulfate (DTGS) detector with 4 cm<sup>-1</sup> spectral resolution and accumulations of 8 spectra per scan in the infrared region from 4000 cm<sup>-1</sup> to 400 cm<sup>-1</sup>.

The N<sub>2</sub>O titration study was also performed in the Micrometrics® Autochem II 2920 apparatus, and the quantity of H<sub>2</sub> consumed following the N<sub>2</sub>O titration was used to estimate the Cu metal dispersion (Dis<sub>Cu</sub>) in the catalysts. A He flow was applied to 0.05 g of catalyst samples at 100 °C for 2 h. After that, the gas was changed to a flow of N<sub>2</sub>O to oxidize the Cu metallic particles on the surface to Cu<sup>+</sup>, and the process was continued for 2 h. The He flow was introduced to remove N<sub>2</sub>O species that were remaining at the surface. A reduction by H<sub>2</sub> pulse reduction of exposed Cu<sub>2</sub>O was then carried out at 350 °C, and the amount of H<sub>2</sub> consumed was measured.

Diffuse reflectance infrared Fourier transform (DRIFT) spectra were acquired with the Bruker Tensor 37 apparatus to explore intermediates and products in reactions. The DRIFT Cell (Praying Mantis™ High-temperature reactor cell) was filled with around 0.05 g of catalyst and heated to 550 °C using a 10 ml/min N<sub>2</sub> flow. Subsequently, the flow was changed to 5 ml/min of CO<sub>2</sub> and 20 ml/min of H<sub>2</sub> at ambient pressure. The spectra were collected after 60 min, 120 min, 180 min, and 240 min of the reaction.

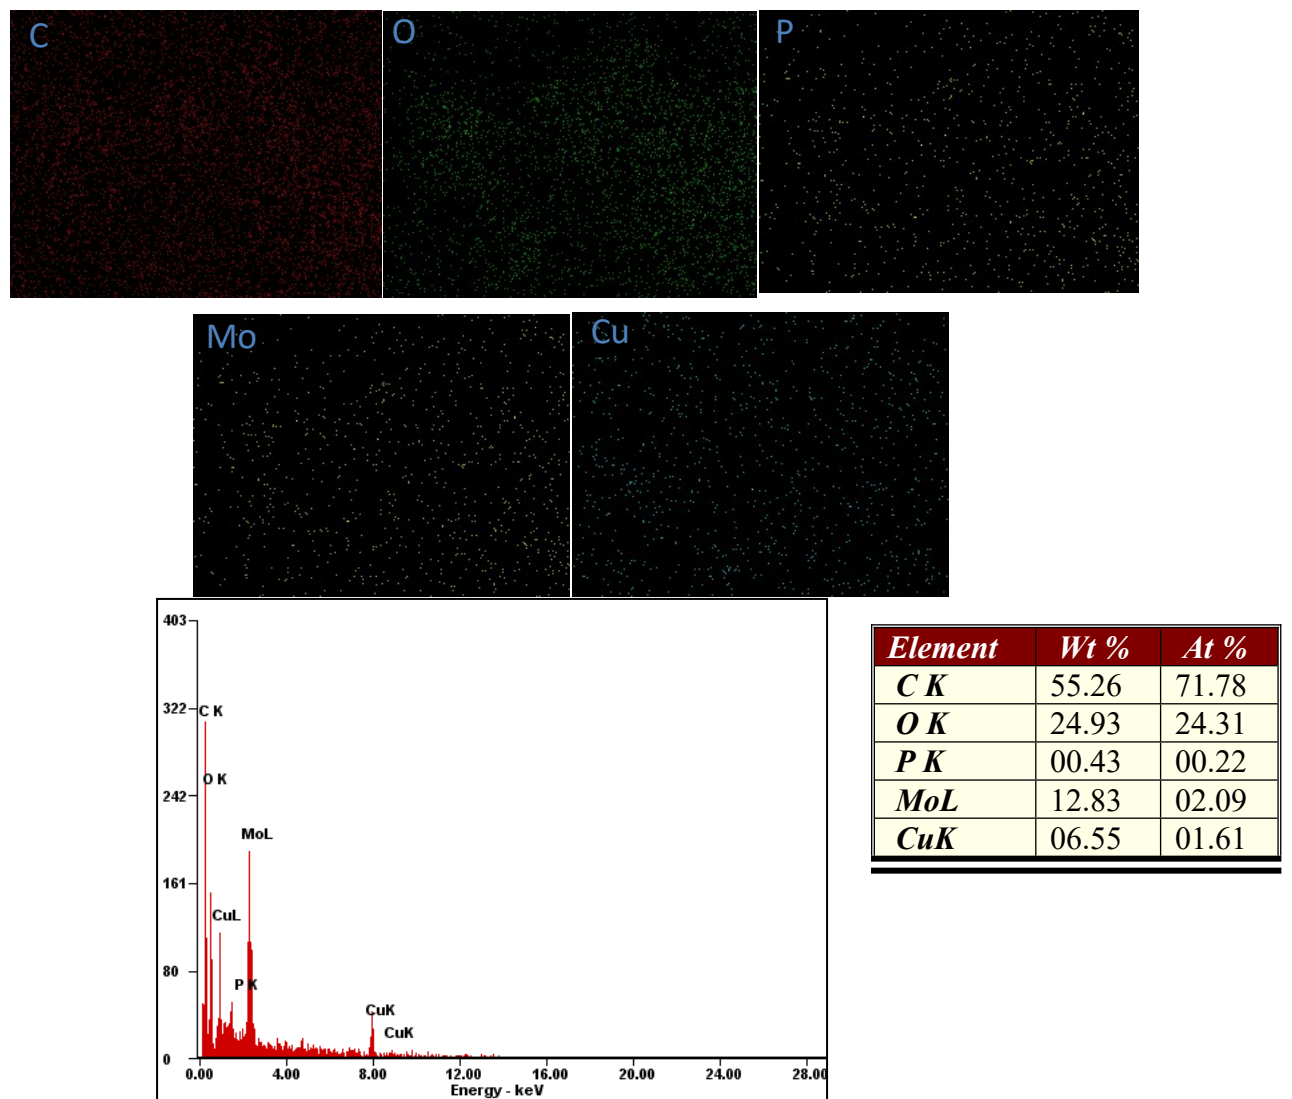

**Fig. S1:** SEM-EDS analysis of NENU-5 MOF

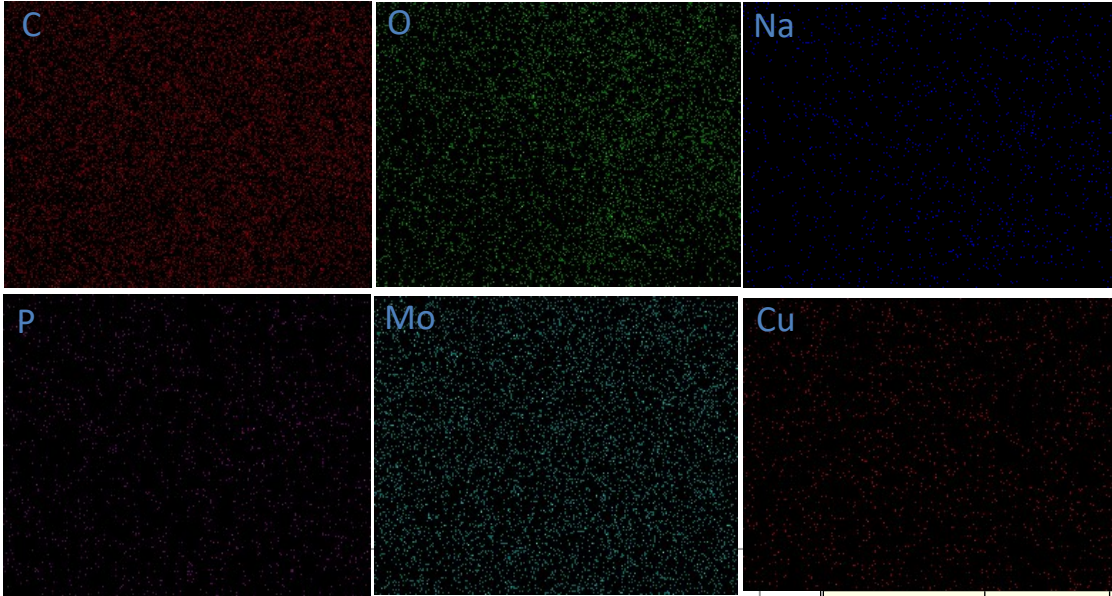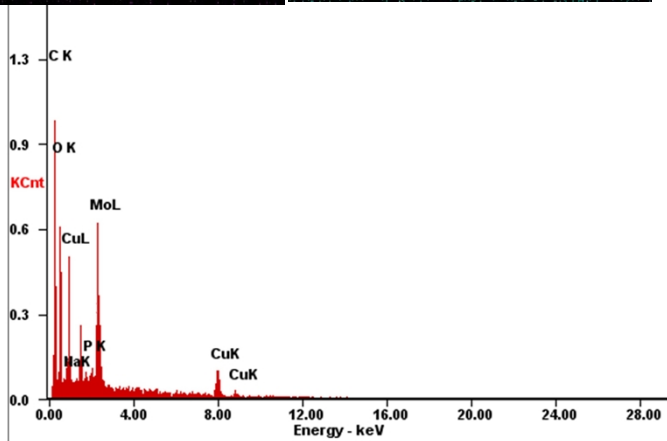

|             | <i>At %</i> |       |
|-------------|-------------|-------|
| <i>C K</i>  | 56.50       | 71.92 |
| <i>O K</i>  | 25.71       | 24.57 |
| <i>Na K</i> | 00.10       | 00.07 |
| <i>P K</i>  | 00.26       | 00.13 |
| <i>Mo L</i> | 10.78       | 01.72 |
| <i>Cu K</i> | 06.63       | 01.59 |

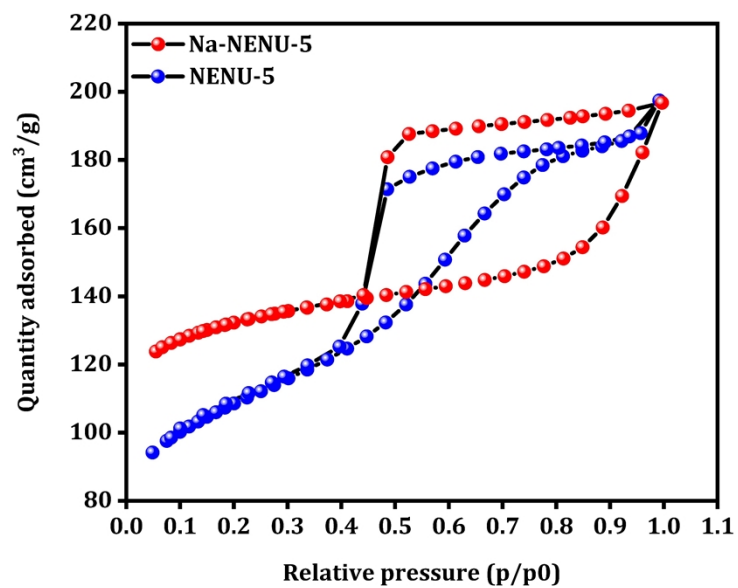

**Fig. S3:**  $N_2$  adsorption-desorption isotherms of NENU-5 and Na-NENU-5

Electron Image 1

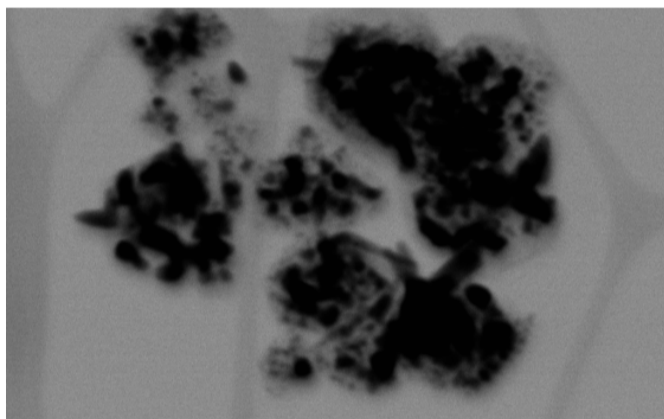

250nm

C K $\alpha$ 1\_2

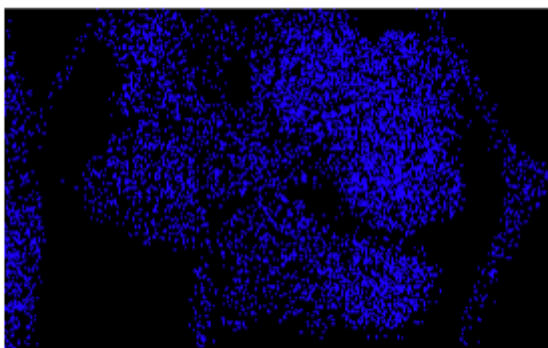

250nm

Mo K $\alpha$ 1

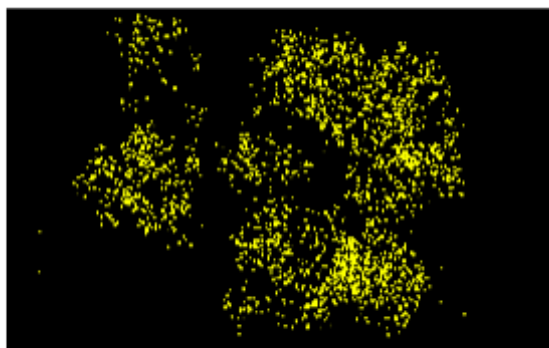

250nm

Cu K $\alpha$ 1

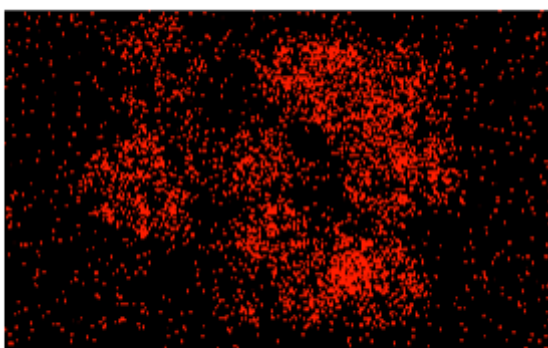

250nm

Na K $\alpha$ 1\_2

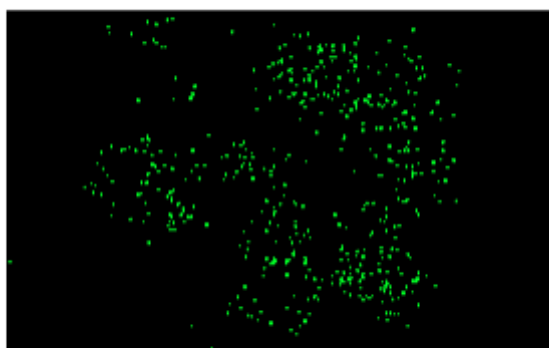

250nm

**Fig. S4:** TEM-EDS mapping of Na-Cu-Mo<sub>2</sub>C

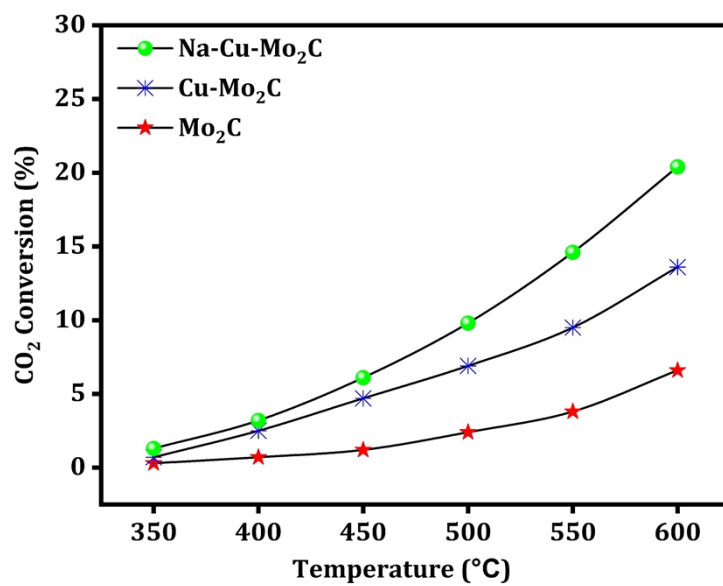

**Fig. S5:** RWGS activity of the derived catalysts (Enlarged portion of Fig. 8a)

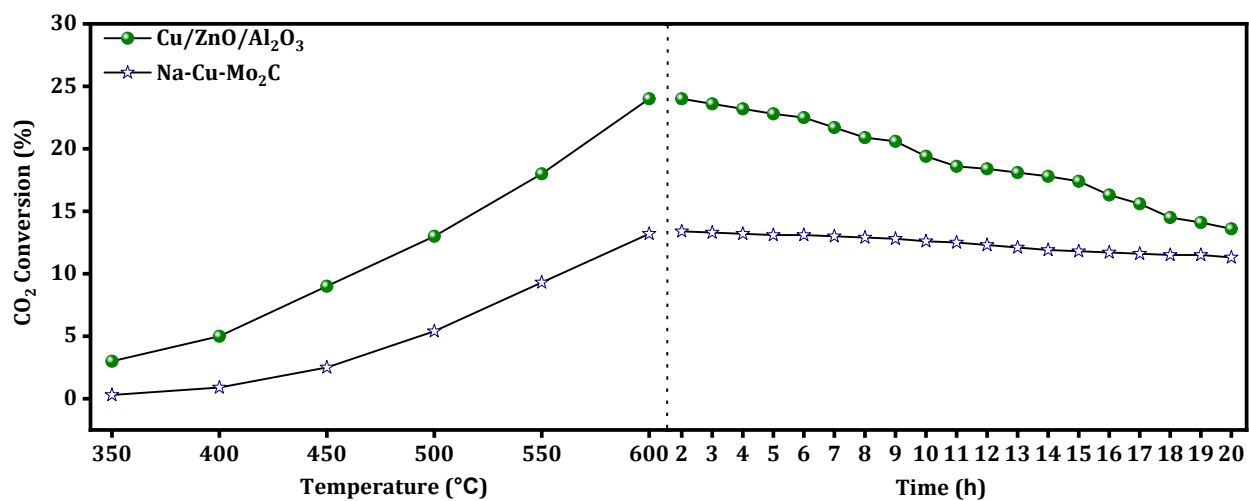

**Fig. S6:** Comparison of the Na-Cu-Mo<sub>2</sub>C catalyst with benchmark Cu/ZnO/Al<sub>2</sub>O<sub>3</sub> catalyst

Electron Image 1

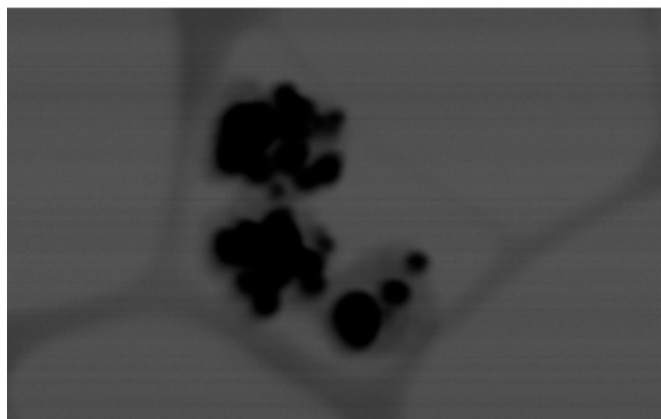

500nm

C K $\alpha$ 1\_2

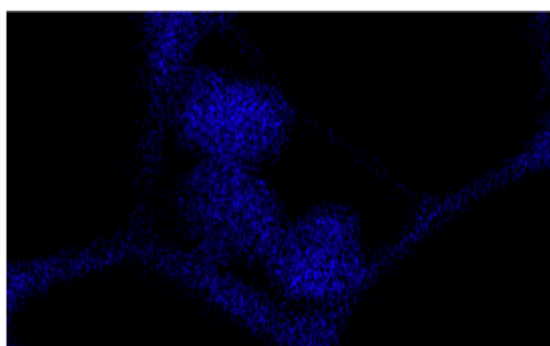

500nm

Mo K $\alpha$ 1

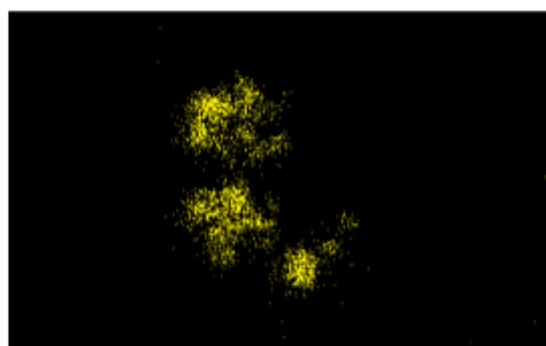

500nm

Cu K $\alpha$ 1

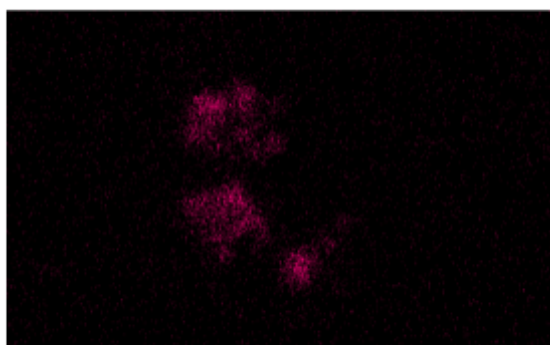

500nm

Na K $\alpha$ 1\_2

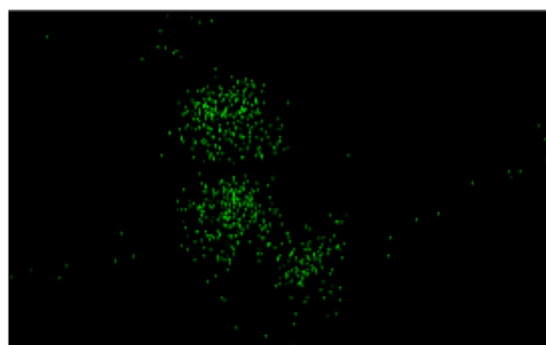

500nm

**Fig. S7** TEM-EDS mapping after stability test for 100 h at 800 °C over Na-Cu-Mo<sub>2</sub>C catalyst

Table S1: A detailed Comparison of the best-reported Fe, Co, and Cu-based catalysts for CO<sub>2</sub> to CO conversion with this work

| Catalysts                            | H <sub>2</sub> :CO <sub>2</sub><br>ratio | CO <sub>2</sub><br>Conversion<br>(%) | Temperature<br>(°C) | GHSV<br>(mL g <sup>-1</sup> <sub>cat</sub> h <sup>-1</sup> ) | CO<br>selectivity<br>(%) | CO<br>Yield<br>(%) | CO production<br>rate<br>(mmol h <sup>-1</sup> g <sub>cat</sub> <sup>-1</sup> ) | H <sub>2</sub><br>Pre-<br>treatment | Stability<br>test (h) | Ref.          |
|--------------------------------------|------------------------------------------|--------------------------------------|---------------------|--------------------------------------------------------------|--------------------------|--------------------|---------------------------------------------------------------------------------|-------------------------------------|-----------------------|---------------|
| CuO/γ-Al <sub>2</sub> O <sub>3</sub> | 4:1                                      | 60                                   | 600                 | 60000                                                        | 100                      | 60                 | -                                                                               | Yes                                 | 80                    | <sup>1</sup>  |
| 0.25Fe0.75Cu                         | 4:1                                      | 37                                   | 450                 | 60000                                                        | 100                      | 37                 | 134.3                                                                           | No                                  | 48                    | <sup>2</sup>  |
| FeCu/CeAl                            | 4:1                                      | 42                                   | 500                 | 30000                                                        | 100                      | 42                 | 102.2                                                                           | Yes                                 | 48                    | <sup>3</sup>  |
| DFNS-TiO <sub>2</sub> -<br>Cu10      | 1:1                                      | 10                                   | 600                 | 2842000                                                      | 99.8                     | 9.98               | 5350                                                                            | Yes                                 | 200                   | <sup>4</sup>  |
| CuSiO-I                              | 2:1                                      | 9.8                                  | 600                 | 3000000                                                      | 100                      | 9.8                | 2585                                                                            | Yes                                 | 45                    | <sup>5</sup>  |
| Cu-2D-SiO <sub>2</sub> -<br>850r     | 2:1                                      | 10                                   | 550                 | 3000000                                                      | 100                      | 10                 | 296                                                                             | Yes                                 | 54                    | <sup>6</sup>  |
| K-Co/CeO <sub>2</sub><br>(1/10)      | 1:1                                      | 37                                   | 600                 | 300000                                                       | 100                      | 37                 | 2478                                                                            | Yes                                 | NR                    | <sup>7</sup>  |
| 15CuCe                               | 3:1                                      | 60                                   | 600                 | 400200                                                       | 100                      | 60                 | 2466                                                                            | Yes                                 | 230                   | <sup>8</sup>  |
| Cu/Al <sub>2</sub> O <sub>3</sub>    | 2:1                                      | 47                                   | 600                 | 300000                                                       | 100                      | 47                 | 2097                                                                            | Yes                                 | 40                    | <sup>9</sup>  |
| Cu/β-Mo <sub>2</sub> C               | 2:1                                      | 40                                   | 600                 | 300000                                                       | 100                      | 40                 | 1786                                                                            | Yes                                 | 40                    | <sup>10</sup> |
| CuSiO/CuOx                           | 3:1                                      | 17.8                                 | 500                 | 60000                                                        | 100                      | 17.8               | 114                                                                             | Yes                                 | 24                    | <sup>11</sup> |
| Cu/Al <sub>2</sub> O <sub>3</sub>    | -                                        | 50                                   | 600                 | 20000                                                        | 100                      | 50                 | 22                                                                              | Yes                                 | NR                    | <sup>12</sup> |
| Co/Mo <sub>2</sub> C                 | 2:1                                      | 9.5                                  | 600                 | 36000                                                        | 100                      | 9.5                | 51                                                                              | Yes                                 | 36                    | <sup>13</sup> |
| Na-Cu-Mo <sub>2</sub> C              | 1:1                                      | 5.9                                  | 600                 | 3000000                                                      | 100                      | 5.9                | 3230                                                                            | No                                  | 250                   | This<br>work  |
| Na-Cu-Mo <sub>2</sub> C              | 4:1                                      | 74                                   | 800                 | 10000                                                        | 100                      | 74                 | 57.8                                                                            | No                                  | 100                   | This<br>work  |

## References

- 1 A. Zakharova, M. W. Iqbal, E. Madadian and D. S. A. Simakov, *ACS Appl. Mater. Interfaces*, 2022, **14**, 22082–22094.
- 2 L. Yang, L. Pastor-Pérez, J. J. Villora-Pico, A. Sepúlveda-Escribano, F. Tian, M. Zhu, Y.-F. Han and T. Ramirez Reina, *ACS Sustainable Chem. Eng.*, 2021, **9**, 12155–12166.
- 3 L. Yang, L. Pastor-Pérez, J. J. Villora-Pico, S. Gu, A. Sepúlveda-Escribano and T. R. Reina, *Applied Catalysis A: General*, 2020, **593**, 117442.
- 4 R. Belgamwar, R. Verma, T. Das, S. Chakraborty, P. Sarawade and V. Polshettiwar, *J. Am. Chem. Soc.*, 2023, **145**, 8634–8646.
- 5 R. Jin, J. Easa and C. P. O'Brien, *ACS Appl. Mater. Interfaces*, 2021, **13**, 38213–38220.
- 6 S. Wang, K. Feng, D. Zhang, D. Yang, M. Xiao, C. Zhang, L. He, B. Yan, G. A. Ozin and W. Sun, *Advanced Science*, 2022, **9**, 2104972.
- 7 L. Wang, H. Liu, Y. Chen, R. Zhang and S. Yang, *Chem. Lett.*, 2013, **42**, 682–683.
- 8 H.-X. Liu, S.-Q. Li, W.-W. Wang, W.-Z. Yu, W.-J. Zhang, C. Ma and C.-J. Jia, *Nat Commun*, 2022, **13**, 867.
- 9 A. M. Bahmanpour, F. Héroguel, M. Kılıç, C. J. Baranowski, L. Artiglia, U. Röthlisberger, J. S. Luterbacher and O. Kröcher, *ACS Catal.*, 2019, **9**, 6243–6251.
- 10 X. Zhang, X. Zhu, L. Lin, S. Yao, M. Zhang, X. Liu, X. Wang, Y.-W. Li, C. Shi and D. Ma, *ACS Catal.*, 2017, **7**, 912–918.
- 11 Y. Yu, R. Jin, J. Easa, W. Lu, M. Yang, X. Liu, Y. Xing and Z. Shi, *Chem. Commun.*, 2019, **55**, 4178–4181.
- 12 S. Choi, B.-I. Sang, J. Hong, K. J. Yoon, J.-W. Son, J.-H. Lee, B.-K. Kim and H. Kim, *Sci Rep*, 2017, **7**, 41207.
- 13 M. D. Porosoff, X. Yang, J. A. Boscoboinik and J. G. Chen, *Angewandte Chemie International Edition*, 2014, **53**, 6705–6709.
